# Supplementary material for: Gut–neuron interaction via Hh signaling regulates intestinal progenitor cell differentiation in Drosophila
Source: PubMed Central journal article supplement — Cell Discov. 2015 Jun 2;1:15006–. doi: 10.1038/celldisc.2015.6 (PMC4860846; doi:10.1038/celldisc.2015.6), 2015-06-02

Han\_Supplementary Figure 1

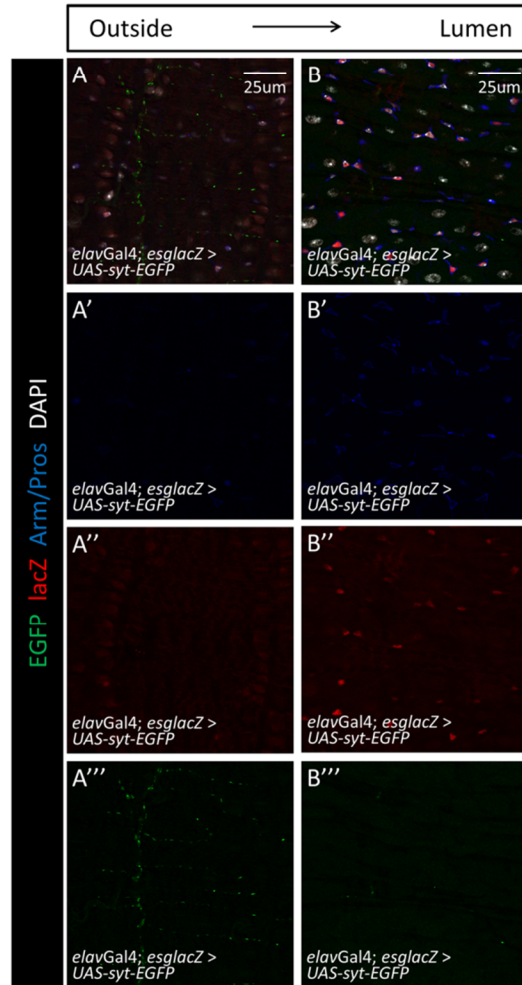

Han\_Supplementary Figure 2

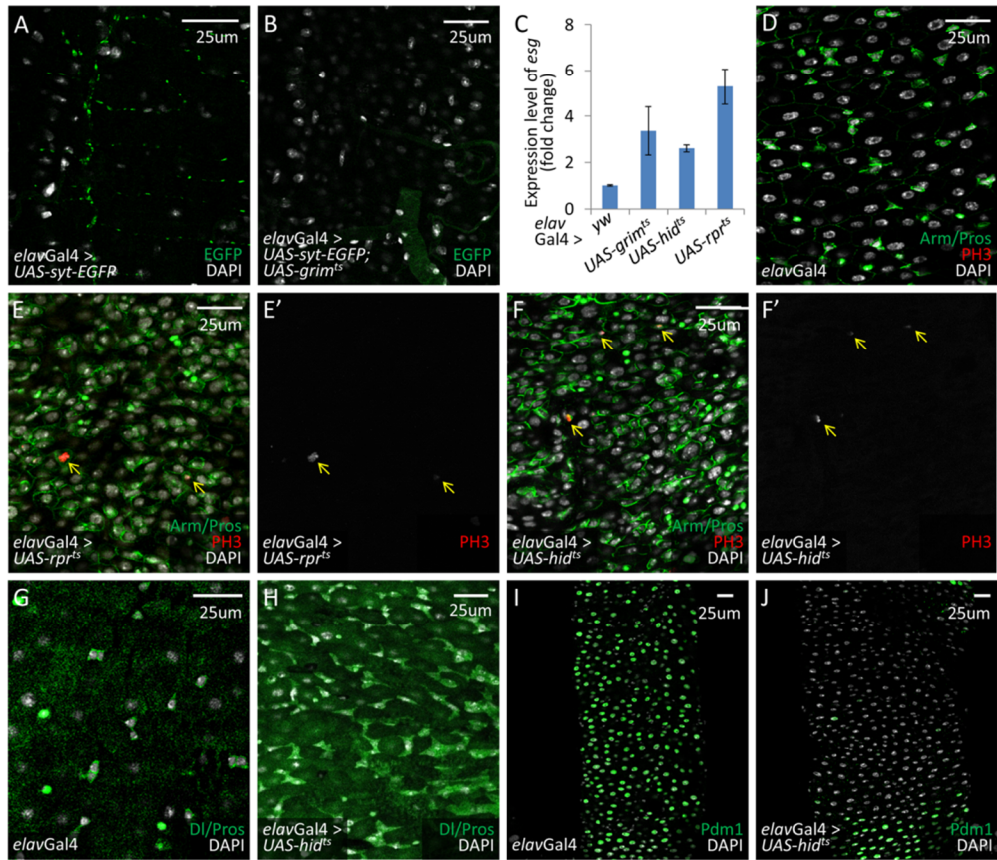

Han\_Supplementary Figure 3

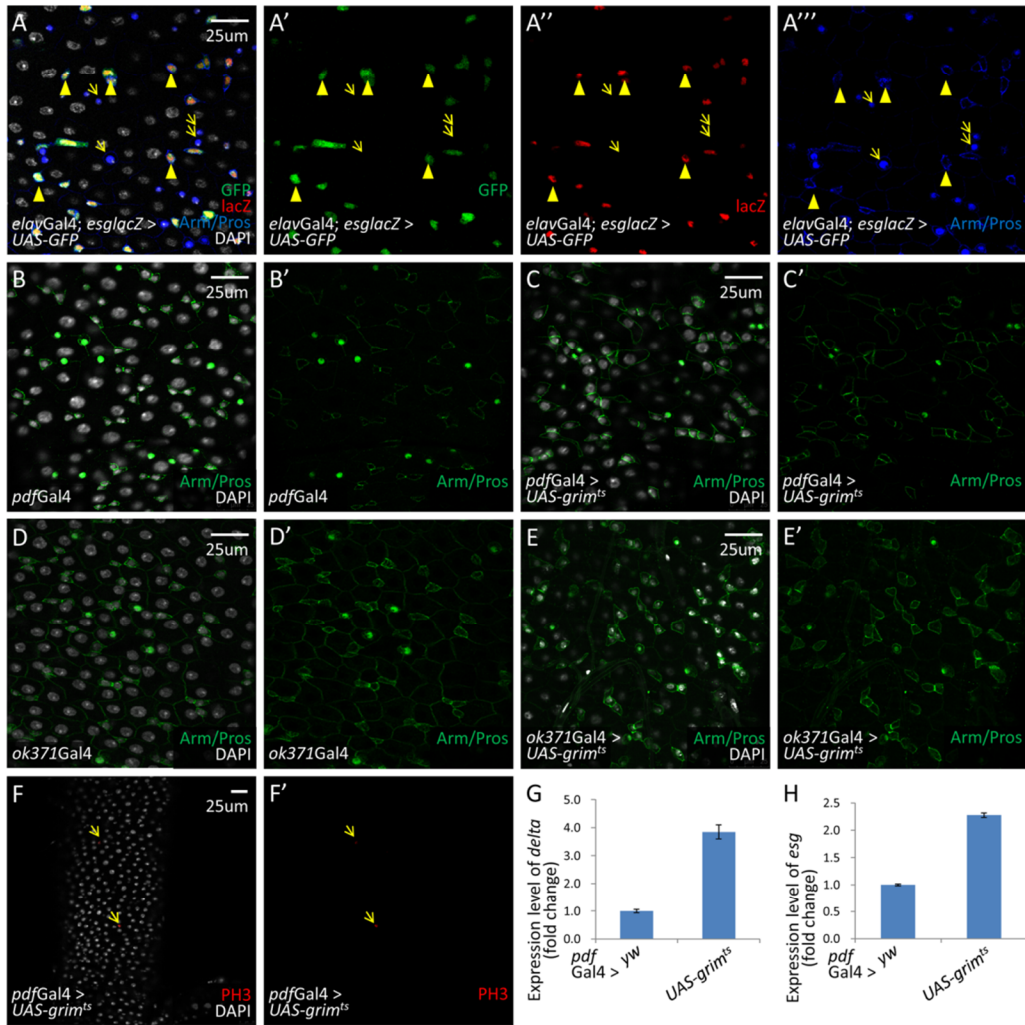

Han\_Supplementary Figure 4

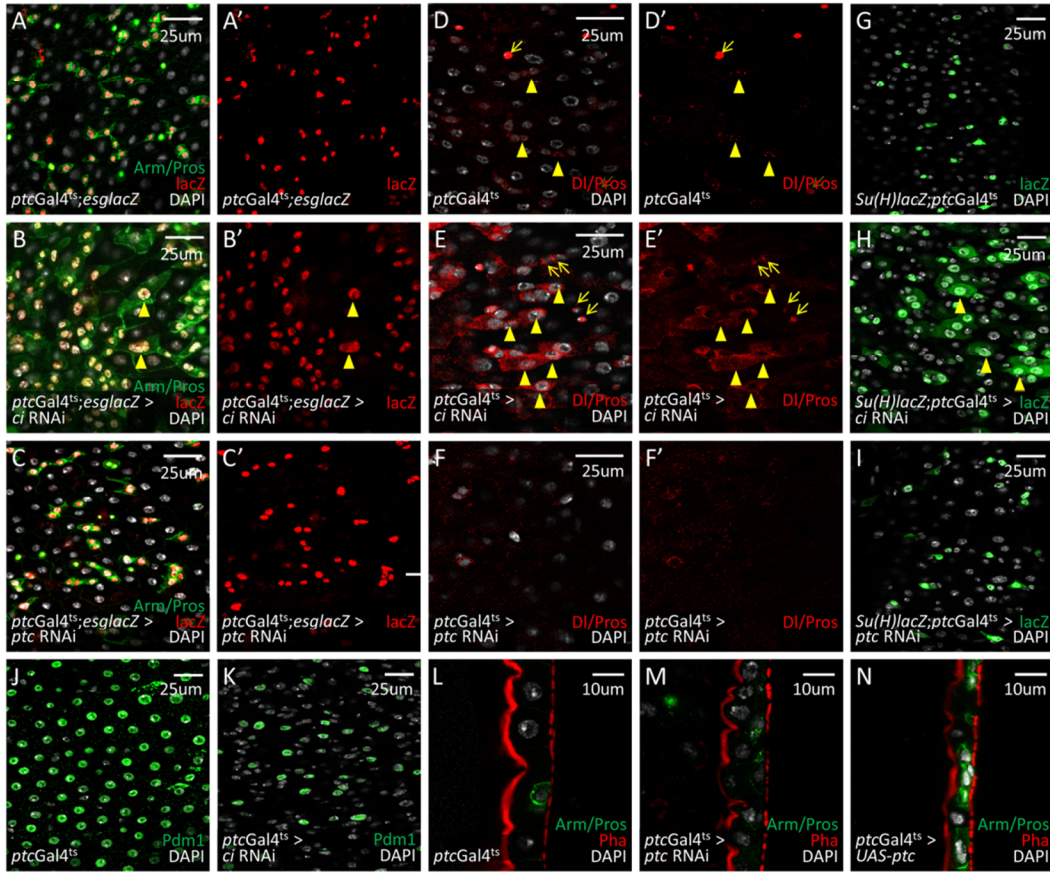

Han\_Supplementary Figure 5

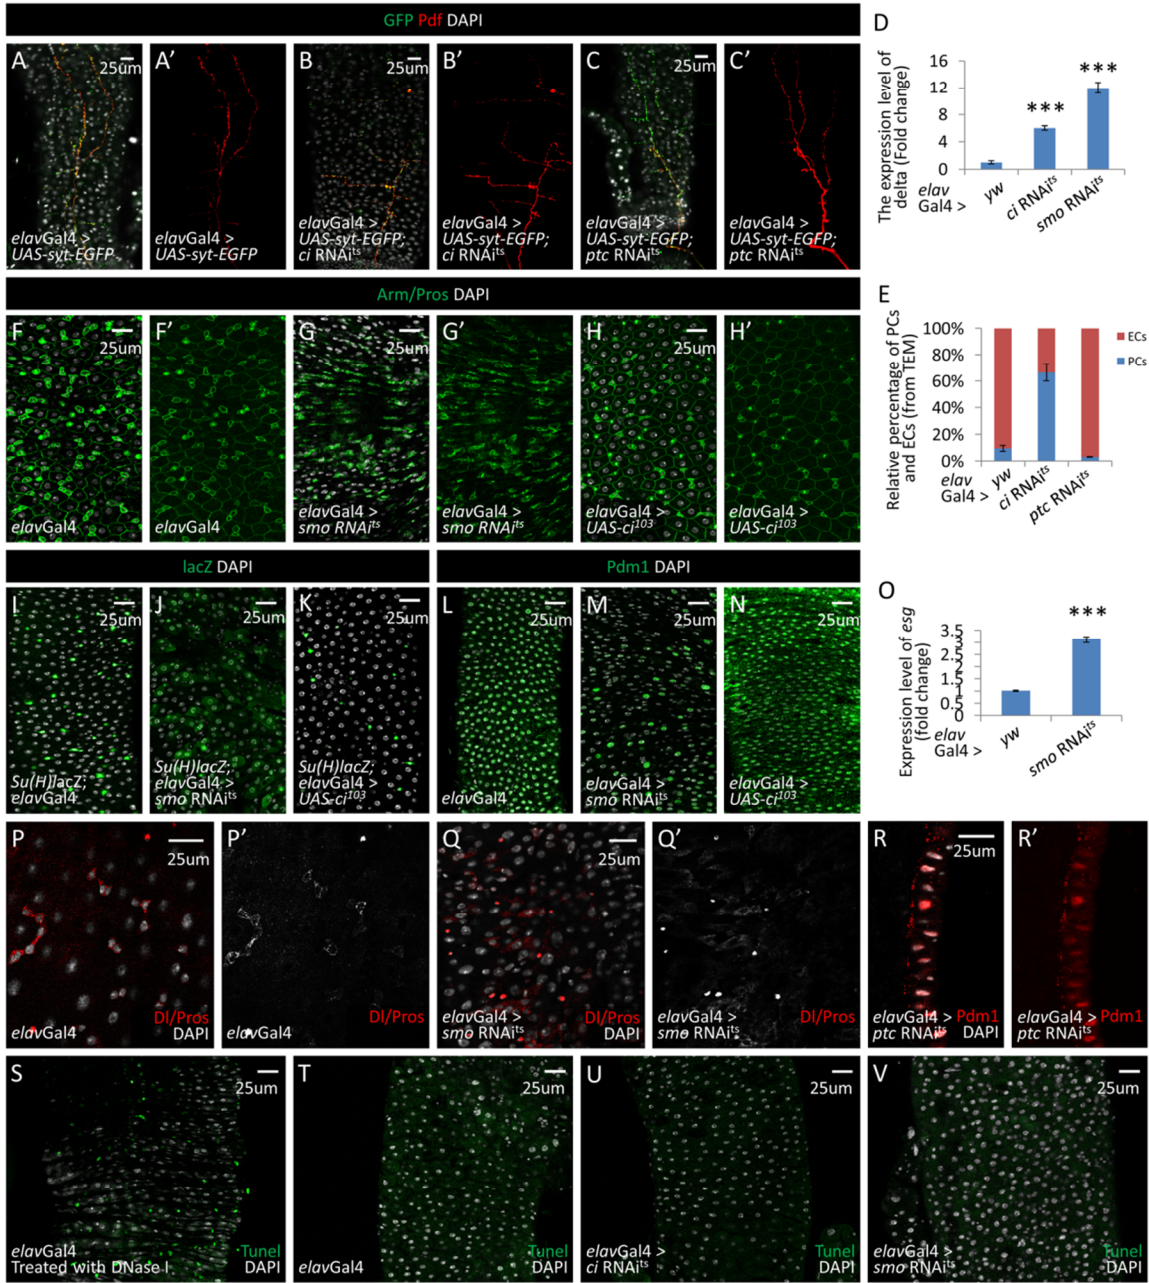

Han\_Supplementary Figure 6

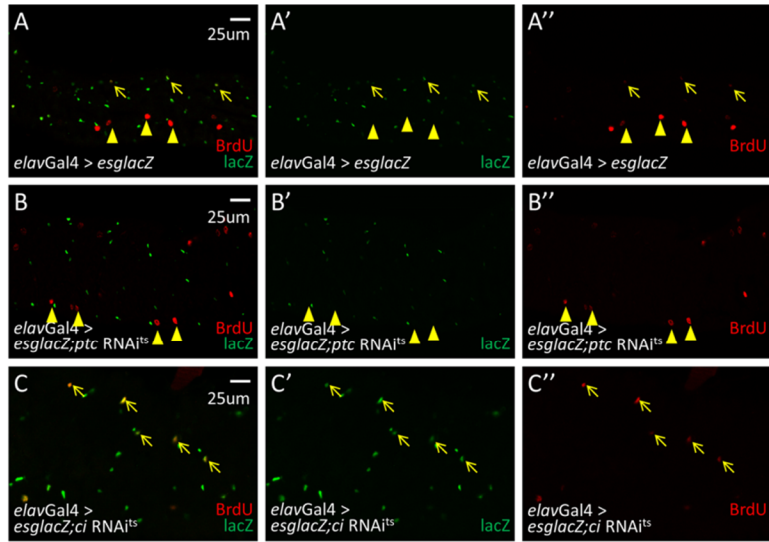

Han\_Supplementary Figure 7

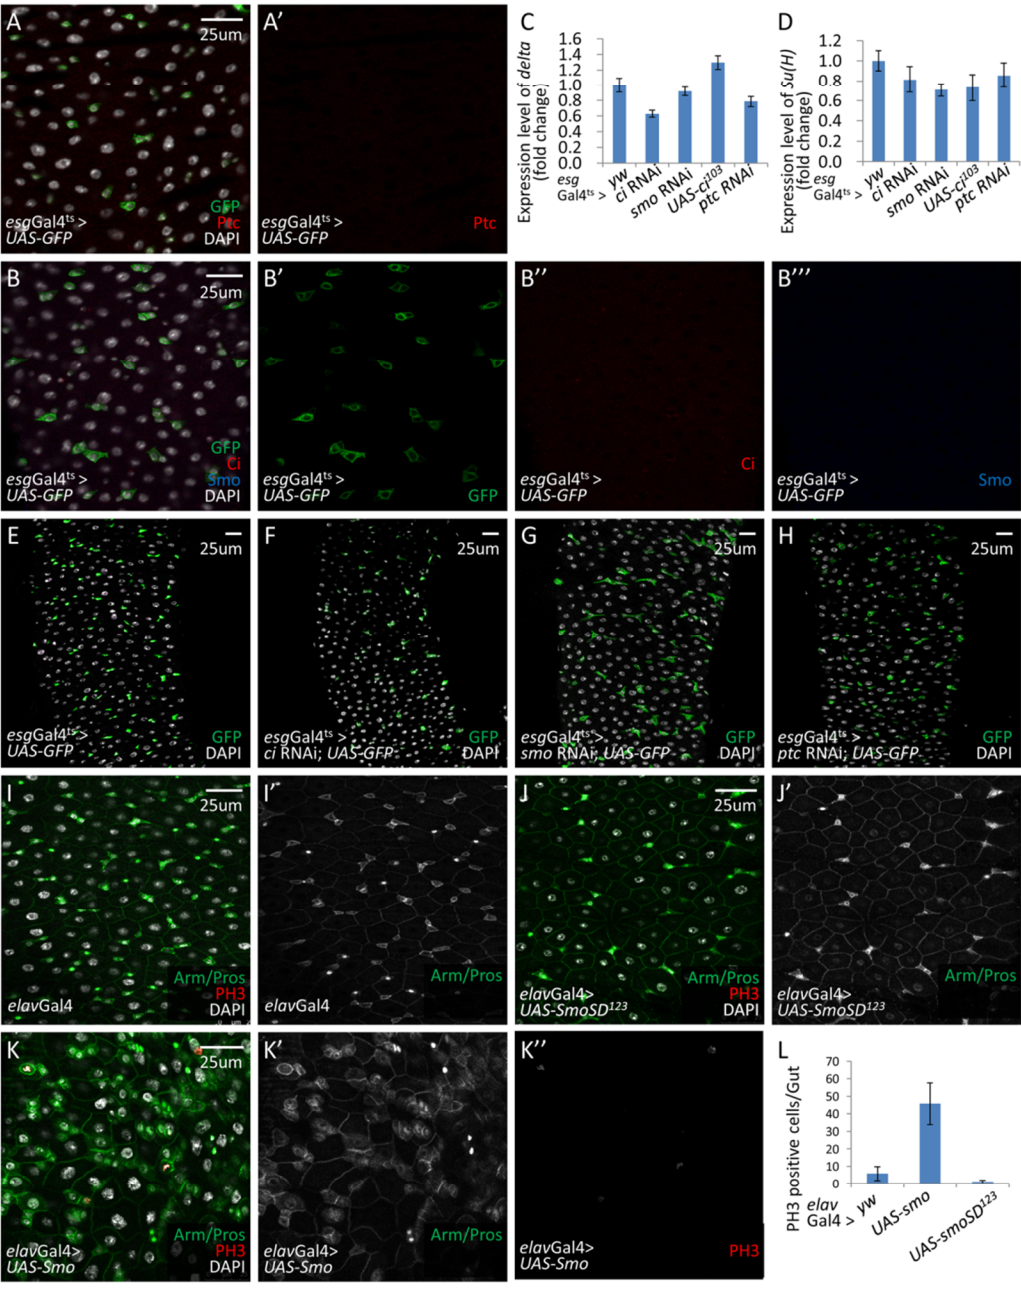

Han\_Supplementary Figure 8

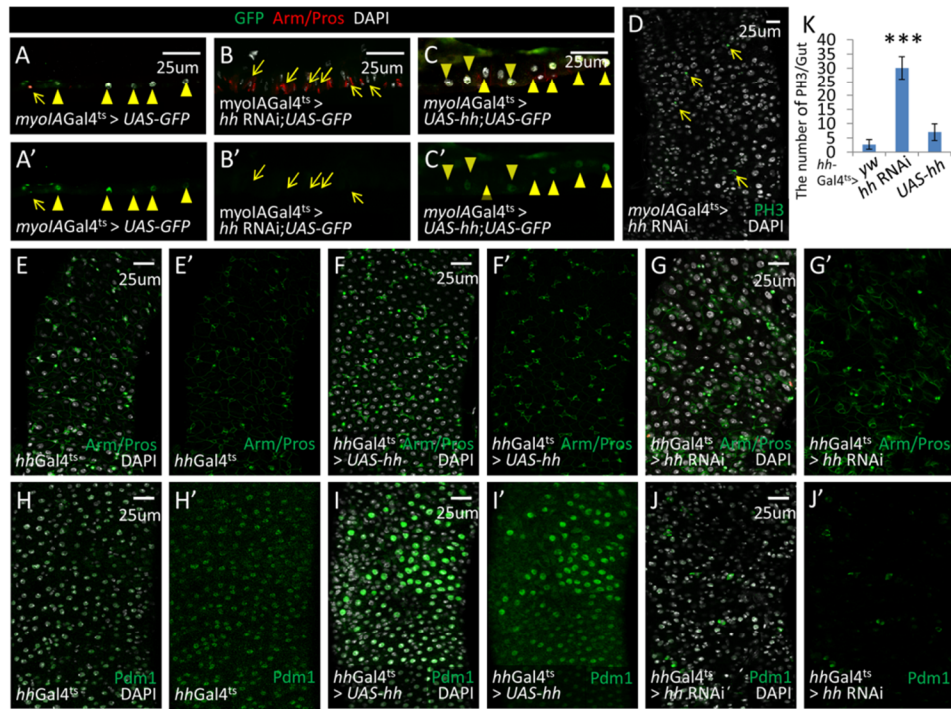



Han\_Supplementary Figure 9

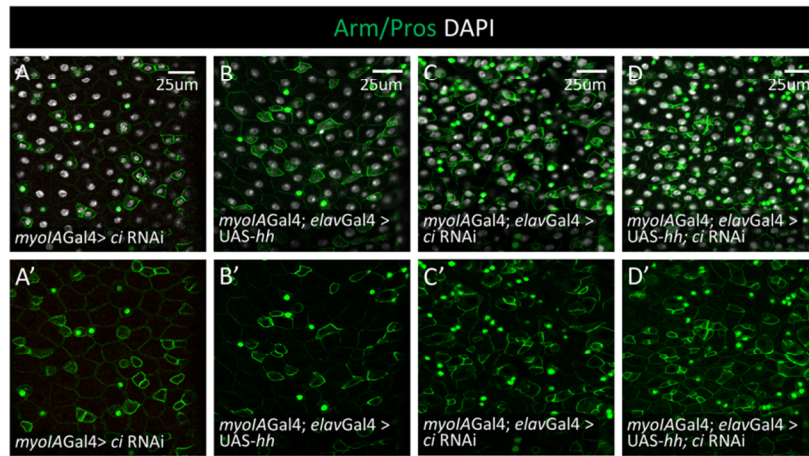

Han\_Supplementary Figure 10

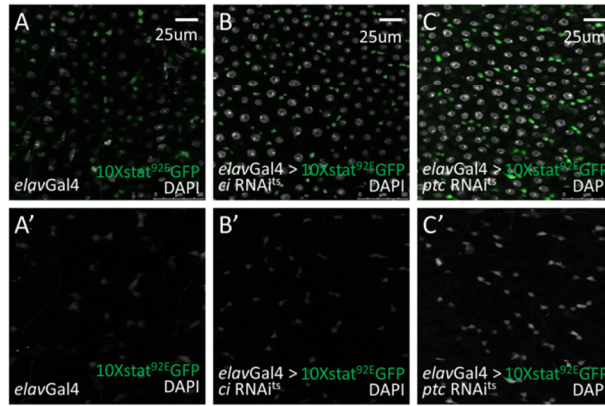

Han\_Supplementary Figure 11

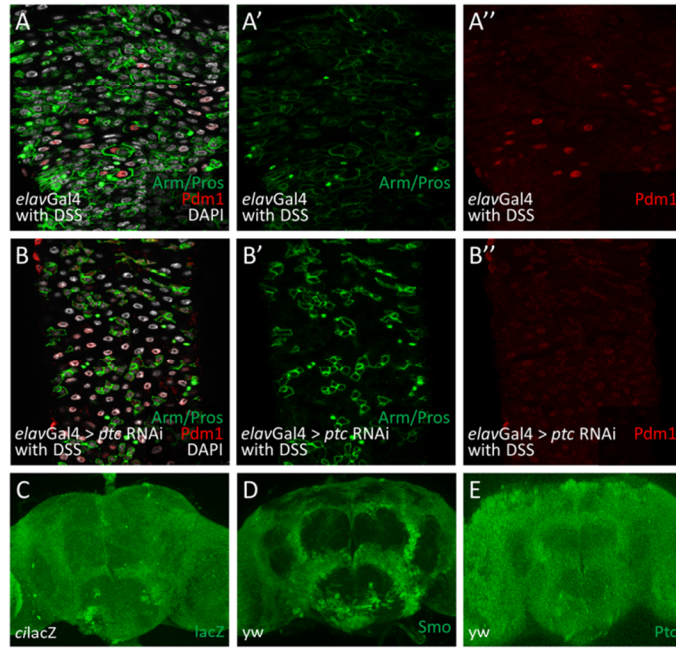

Han\_Supplementary Figure 12

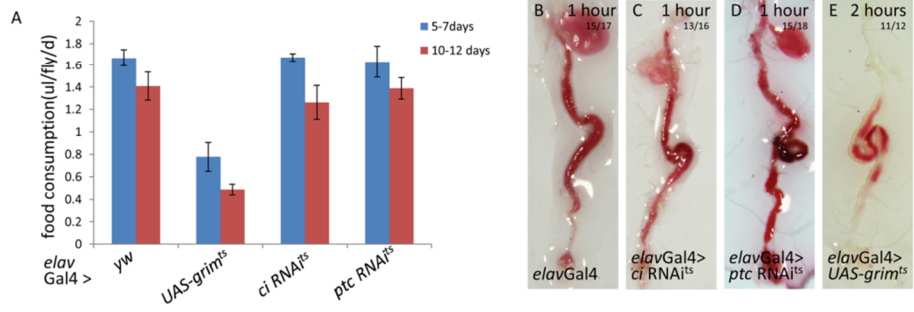

Supplement: celldisc20156-s2.pdf [file celldisc20156-s2.pdf]
